# Supplementary material for: Risk Factors Associated With Mortality in Hypersensitivity Pneumonitis: A Meta-analysis
Source: Research Square preprint supplement (doi:10.21203/rs.3.rs-951727/v1), 2021-10-20
Supplement: Supplementary file 1 [file 4451e13dc3ef3b4412ac265c.docx]

**Supplementary information**

**Risk factors associated with mortality in hypersensitivity pneumonitis: a meta-analysis**

**Authors:** Sanjukta Dasgupta1, Anindita Bhattacharya1, Sushmita Roy Chowdhury2, Koel Chaudhury1

**Affiliations:**

1. School of Medical Science and Technology, Indian Institute of Technology Kharagpur, India

2. Fortis Hospital, Anandapur, Kolkata, India

**Correspondence**:

*Koel Chaudhury

Orcid ID: https://orcid.org/0000-0002-9390-1179

School of Medical Science & Technology, Indian Institute of Technology Kharagpur, 721302 India; [koel@smst.iitkgp.ac.in](mailto:koel@smst.iitkgp.ac.in)

**Table S1** Univariate analysis of mortality risk factors in patients with hypersensitivity pneumonitis (HP)

| Risk factors | Odds ratio (OR) | 95% CI | P value (OR) | Heterogeneity (I2) | P value (I2) |
| --- | --- | --- | --- | --- | --- |
| Age | 1.038 | 1.028-1.048 | 0.000 | 40.8% | 0.077 |
| Sex (male) | 1.508 | 1.240-1.834 | 0.000 | 32.4% | 0.180 |
| Smoking status | 1.010 | 0.993-1.027 | 0.252 | 78.4% | 0.000 |
| FVC | 0.977 | 0.972-0.983 | 0.000 | 76.9% | 0.000 |
| DLco | 0.974 | 0.968- 0.981 | 0.000 | 85.1% | 0.000 |
| Honeycombing | 1.086 | 1.065-1.108 | 0.000 | 86.5% | 0.000 |
| Mosaic attenuation | 1.016 | 1.000-1.032 | 0.044 | 72.3% | 0.001 |
| Reticulation | 1.021 | 1.014-1.029 | 0.000 | 95.0% | 0.000 |
| GGO | 0.989 | 0.982-0.996 | 0.003 | 62.5% | 0.004 |
| Traction bronchiectasis | 1.141 | 1.092-1.192 | 0.000 | 88.4% | 0.000 |

FVC: Forced vital capacity, DLco: Diffusing capacity for carbon monoxide, GGO: Ground glass opacity

**Table S2** Multivariate analysis of mortality risk factors in patients with hypersensitivity pneumonitis (HP)

| Risk factors | Odds ratio (OR) | 95% CI | P value (OR) | Heterogeneity (I2) | P value (I2) |
| --- | --- | --- | --- | --- | --- |
| Age | 1.036 | 1.025-1.046 | 0.000 | 58.0% | 0.011 |
| Sex (male) | 1.396 | 1.004-1.943 | 0.047 | 0.0% | 0.779 |
| Smoking status | 1.009 | 0.989-1.029 | 0.396 | 74.5% | 0.001 |
| FVC | 0.972 | 0.964-0.981 | 0.000 | 68.4% | 0.004 |
| DLco | 0.954 | 0.941-0.968 | 0.000 | 51.7% | 0.126 |
| Honeycombing | 1.121 | 1.070-1.175 | 0.000 | 89.4% | 0.000 |
| Mosaic attenuation | 0.184 | 0.074-0.455 | 0.000 | 61.1% | 0.109 |
| GGO | 0.960 | 0.921-1.001 | 0.056 | 0.0% | 0.743 |
| Traction bronchiectasis | 1.107 | 1.048-1.169 | 0.000 | 83.3% | 0.003 |

FVC: Forced vital capacity, DLco: Diffusing capacity for carbon monoxide, GGO: Ground glass opacity


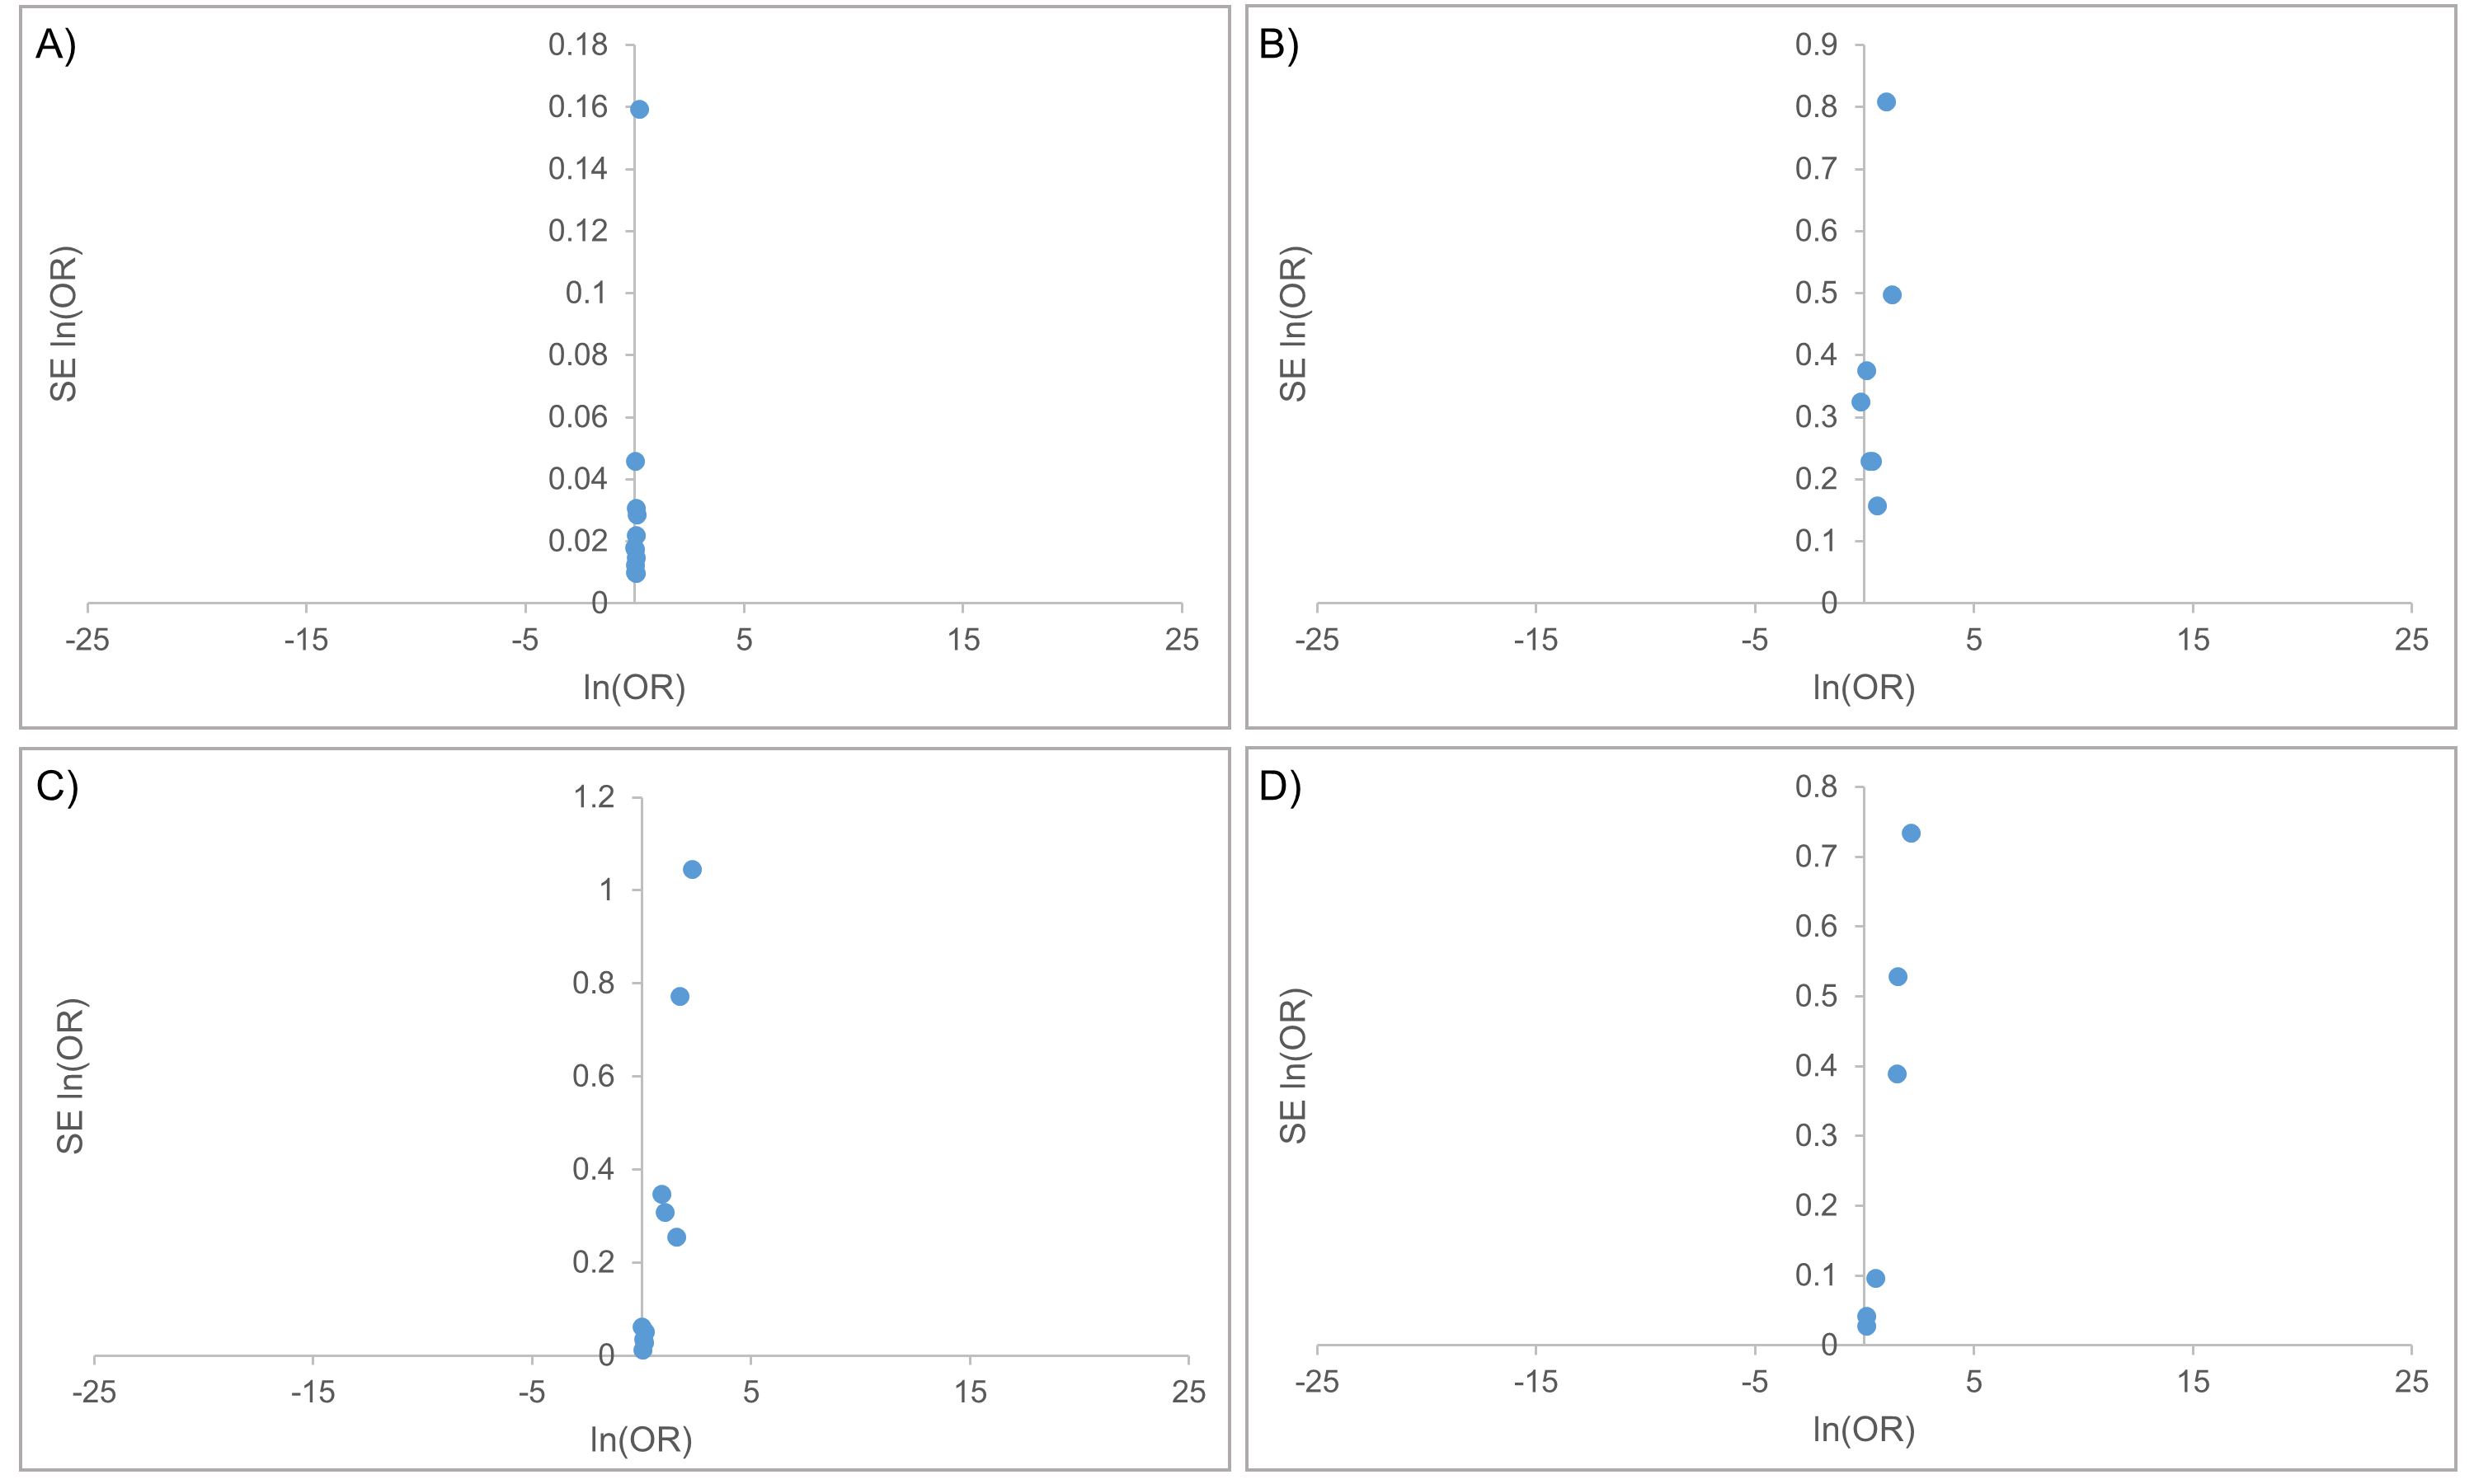


**Fig. S1** Funnel plots show publication bias for (A) age (B) sex (male) (C) honeycombing and (D) traction bronchiectasis in patients with hypersensitivity pneumonitis (HP)
